# Supplementary material
Source: HighWire-hosted journal article supplement (https://oem.bmj.com/content/74/3/192)
Supplement: inline-supplementary-material-1 [file inline-supplementary-material-1.pdf]

**Supplemental Table 1** Association of preterm birth (PTB) and small-for-gestational age (SGA) with occupational physical activities and psychosocial stressors in the first trimester of pregnancy, National Birth Defects Prevention Study (NBDPS), 1997-2009

| O*NET item <sup>a</sup>      | PTB                   |                        |                          |                        | SGA                   |                       |                          |                        |
|------------------------------|-----------------------|------------------------|--------------------------|------------------------|-----------------------|-----------------------|--------------------------|------------------------|
|                              | Crude OR <sup>b</sup> | (95% CI <sup>c</sup> ) | Adjusted OR <sup>b</sup> | (95% CI <sup>c</sup> ) | Crude OR <sup>b</sup> | 95% CI <sup>c</sup>   | Adjusted OR <sup>b</sup> | (95% CI <sup>c</sup> ) |
| General physical activities  |                       |                        |                          |                        |                       |                       |                          |                        |
| Q1                           |                       | Referent               |                          | Referent               |                       | Referent              |                          | Referent               |
| Q2                           | 1.04                  | (0.79 to 1.38)         | 0.99                     | (0.75 to 1.32)         | 1.07                  | (0.80 to 1.44)        | 1.00                     | (0.75 to 1.34)         |
| Q3                           | 1.15                  | (0.88 to 1.49)         | 1.07                     | (0.82 to 1.41)         | 1.22                  | (0.93 to 1.60)        | 1.11                     | (0.84 to 1.46)         |
| Q4                           | 1.26                  | (0.96 to 1.64)         | 1.14                     | (0.87 to 1.50)         | 1.32                  | (0.99 to 1.73)        | 1.18                     | (0.89 to 1.56)         |
| Bending or twisting the body |                       |                        |                          |                        |                       |                       |                          |                        |
| Q1                           |                       | Referent               |                          | Referent               |                       | Referent              |                          | Referent               |
| Q2                           | 1.18                  | (0.89 to 1.56)         | 1.15                     | (0.87 to 1.53)         | 1.07                  | (0.80 to 1.43)        | 1.04                     | (0.78 to 1.39)         |
| Q3                           | <b>1.38</b>           | <b>(1.04 to 1.83)</b>  | 1.27                     | (0.95 to 1.70)         | <b>1.43</b>           | <b>(1.08 to 1.89)</b> | 1.28                     | (0.95 to 1.72)         |
| Q4                           | <b>1.55</b>           | <b>(1.19 to 2.04)</b>  | <b>1.44</b>              | <b>(1.08 to 1.92)</b>  | <b>1.48</b>           | <b>(1.12 to 1.95)</b> | 1.31                     | (0.98 to 1.76)         |
| Standing                     |                       |                        |                          |                        |                       |                       |                          |                        |
| Q1                           |                       | Referent               |                          | Referent               |                       | Referent              |                          | Referent               |
| Q2                           | 1.03                  | (0.78 to 1.35)         | 1.02                     | (0.77 to 1.34)         | 1.12                  | (0.84 to 1.49)        | 1.13                     | (0.85 to 1.50)         |
| Q3                           | 1.08                  | (0.83 to 1.41)         | 1.04                     | (0.80 to 1.36)         | 1.14                  | (0.86 to 1.50)        | 1.11                     | (0.84 to 1.47)         |
| Q4                           | 1.21                  | (0.93 to 1.57)         | 1.06                     | (0.80 to 1.41)         | <b>1.43</b>           | <b>(1.10 to 1.87)</b> | 1.23                     | (0.92 to 1.64)         |
| Handling and moving objects  |                       |                        |                          |                        |                       |                       |                          |                        |
| Q1                           |                       | Referent               |                          | Referent               |                       | Referent              |                          | Referent               |
| Q2                           | 1.24                  | (0.95 to 1.63)         | 1.19                     | (0.90 to 1.56)         | 1.23                  | (0.93 to 1.63)        | 1.17                     | (0.88 to 1.56)         |
| Q3                           | 1.13                  | (0.86 to 1.50)         | 1.10                     | (0.83 to 1.45)         | 1.09                  | (0.81 to 1.45)        | 1.06                     | (0.79 to 1.42)         |
| Q4                           | 1.27                  | (0.97 to 1.66)         | 1.12                     | (0.84 to 1.49)         | <b>1.48</b>           | <b>(1.13 to 1.94)</b> | 1.29                     | (0.96 to 1.72)         |
| Walking and running          |                       |                        |                          |                        |                       |                       |                          |                        |
| Q1                           |                       | Referent               |                          | Referent               |                       | Referent              |                          | Referent               |
| Q2                           | 0.97                  | (0.74 to 1.27)         | 0.97                     | (0.74 to 1.28)         | 0.80                  | (0.60 to 1.07)        | 0.81                     | (0.60 to 1.08)         |
| Q3                           | 0.92                  | (0.70 to 1.22)         | 0.87                     | (0.65 to 1.15)         | 1.18                  | (0.90 to 1.55)        | 1.11                     | (0.84 to 1.47)         |

|                                           |             |                       |             |                       |             |                       |             |                       |
|-------------------------------------------|-------------|-----------------------|-------------|-----------------------|-------------|-----------------------|-------------|-----------------------|
| Q4                                        | <b>1.34</b> | <b>(1.04 to 1.73)</b> | 1.23        | (0.95 to 1.61)        | 1.27        | (0.98 to 1.66)        | 1.15        | (0.87 to 1.51)        |
| Kneeling, crouching, or stooping          |             |                       |             |                       |             |                       |             |                       |
| Q1                                        |             | Referent              |             | Referent              |             | Referent              |             | Referent              |
| Q2                                        | 1.14        | (0.87 to 1.50)        | 1.11        | (0.85 to 1.46)        | 1.34        | (1.00 to 1.79)        | 1.30        | (0.97 to 1.73)        |
| Q3                                        | 1.12        | (0.84 to 1.49)        | 1.05        | (0.78 to 1.40)        | <b>1.41</b> | <b>(1.05 to 1.90)</b> | 1.29        | (0.95 to 1.75)        |
| Q4                                        | 1.27        | (0.97 to 1.67)        | 1.15        | (0.87 to 1.52)        | <b>1.53</b> | <b>(1.15 to 2.04)</b> | <b>1.37</b> | <b>(1.02 to 1.85)</b> |
| Keeping or regaining balance              |             |                       |             |                       |             |                       |             |                       |
| Q1                                        |             | Referent              |             | Referent              |             | Referent              |             | Referent              |
| Q2                                        | 1.02        | (0.77 to 1.35)        | 1.00        | (0.75 to 1.33)        | 1.31        | (0.97 to 1.76)        | 1.28        | (0.96 to 1.73)        |
| Q3                                        | <b>1.32</b> | <b>(1.01 to 1.70)</b> | 1.24        | (0.96 to 1.62)        | <b>1.38</b> | <b>(1.04 to 1.85)</b> | 1.30        | (0.97 to 1.74)        |
| Q4                                        | 1.20        | (0.92 to 1.57)        | 1.06        | (0.80 to 1.41)        | <b>1.60</b> | <b>(1.20 to 2.13)</b> | <b>1.40</b> | <b>(1.04 to 1.89)</b> |
| Dealing with unpleasant or angry people   |             |                       |             |                       |             |                       |             |                       |
| Q1                                        |             | Referent              |             | Referent              |             | Referent              |             | Referent              |
| Q2                                        | 1.04        | (0.80 to 1.36)        | 1.12        | (0.86 to 1.47)        | 0.87        | (0.66 to 1.14)        | 0.95        | (0.72 to 1.25)        |
| Q3                                        | 0.92        | (0.70 to 1.22)        | 0.96        | (0.72 to 1.28)        | 0.87        | (0.66 to 1.15)        | 0.91        | (0.69 to 1.21)        |
| Q4                                        | 1.24        | (0.96 to 1.60)        | 1.26        | (0.97 to 1.63)        | 1.08        | (0.84 to 1.40)        | 1.10        | (0.84 to 1.43)        |
| Dealing with conflict situations          |             |                       |             |                       |             |                       |             |                       |
| Q1                                        |             | Referent              |             | Referent              |             | Referent              |             | Referent              |
| Q2                                        | 1.01        | (0.78 to 1.32)        | 0.95        | (0.72 to 1.25)        | 1.00        | (0.76 to 1.30)        | 1.12        | (0.85 to 1.47)        |
| Q3                                        | 0.97        | (0.74 to 1.26)        | 0.95        | (0.74 to 1.23)        | 0.99        | (0.76 to 1.29)        | 1.06        | (0.81 to 1.39)        |
| Q4                                        | 1.06        | (0.81 to 1.39)        | 1.15        | (0.88 to 1.51)        | 0.75        | (0.56 to 1.00)        | 0.89        | (0.66 to 1.20)        |
| Dealing with physically aggressive people |             |                       |             |                       |             |                       |             |                       |
| Q1                                        |             | Referent              |             | Referent              |             | Referent              |             | Referent              |
| Q2                                        | 0.99        | (0.75 to 1.30)        | 1.01        | (0.77 to 1.33)        | 0.99        | (0.76 to 1.30)        | 1.02        | (0.78 to 1.34)        |
| Q3                                        | 1.00        | (0.76 to 1.32)        | 1.05        | (0.79 to 1.39)        | 0.95        | (0.72 to 1.25)        | 1.00        | (0.76 to 1.32)        |
| Q4                                        | <b>1.34</b> | <b>(1.03 to 1.73)</b> | <b>1.38</b> | <b>(1.06 to 1.79)</b> | 1.00        | (0.76 to 1.30)        | 1.03        | (0.79 to 1.35)        |

|                                                 |             |                       |      |                |             |                       |             |                       |  |
|-------------------------------------------------|-------------|-----------------------|------|----------------|-------------|-----------------------|-------------|-----------------------|--|
| Resolving conflicts and negotiating with others |             |                       |      |                |             |                       |             |                       |  |
| Q1                                              |             | Referent              |      | Referent       |             | Referent              |             | Referent              |  |
| Q2                                              | 0.94        | (0.72 to 1.22)        | 0.98 | (0.75 to 1.28) | 1.02        | (0.79 to 1.33)        | 1.07        | (0.82 to 1.39)        |  |
| Q3                                              | 0.99        | (0.76 to 1.29)        | 1.13 | (0.86 to 1.49) | 0.96        | (0.73 to 1.25)        | 1.09        | (0.82 to 1.45)        |  |
| Q4                                              | 0.76        | (0.57 to 1.01)        | 0.88 | (0.65 to 1.20) | <b>0.58</b> | <b>(0.43 to 0.79)</b> | 0.68        | (0.49 to 0.95)        |  |
| Making repetitive motions                       |             |                       |      |                |             |                       |             |                       |  |
| Q1                                              |             | Referent              |      | Referent       |             | Referent              |             | Referent              |  |
| Q2                                              | 1.09        | (0.83 to 1.42)        | 1.02 | (0.78 to 1.34) | <b>1.42</b> | <b>(1.06 to 1.91)</b> | 1.35        | (1.00 to 1.82)        |  |
| Q3                                              | 1.00        | (0.76 to 1.30)        | 0.89 | (0.67 to 1.18) | <b>1.57</b> | <b>(1.18 to 2.09)</b> | 1.41        | (1.05 to 1.90)        |  |
| Q4                                              | 1.15        | (0.88 to 1.50)        | 1.00 | (0.76 to 1.33) | <b>1.76</b> | <b>(1.32 to 2.34)</b> | <b>1.56</b> | <b>(1.15 to 2.11)</b> |  |
| Pace determined by speed of equipment           |             |                       |      |                |             |                       |             |                       |  |
| Q1                                              |             | Referent              |      | Referent       |             | Referent              |             | Referent              |  |
| Q2                                              | 1.23        | (0.94 to 1.61)        | 1.11 | (0.83 to 1.47) | 0.88        | (0.67 to 1.17)        | 0.85        | (0.64 to 1.13)        |  |
| Q3                                              | 1.19        | (0.91 to 1.55)        | 1.07 | (0.81 to 1.41) | 1.14        | (0.87 to 1.49)        | 1.04        | (0.79 to 1.37)        |  |
| Q4                                              | 1.15        | (0.88 to 1.51)        | 0.97 | (0.73 to 1.30) | 1.15        | (0.88 to 1.50)        | 0.96        | (0.73 to 1.28)        |  |
| Degree of automation                            |             |                       |      |                |             |                       |             |                       |  |
| Q1                                              |             | Referent              |      | Referent       |             | Referent              |             | Referent              |  |
| Q2                                              | 1.07        | (0.83 to 1.38)        | 1.06 | (0.83 to 1.37) | 1.04        | (0.80 to 1.37)        | 1.03        | (0.79 to 1.35)        |  |
| Q3                                              | <b>0.75</b> | <b>(0.57 to 0.99)</b> | 0.74 | (0.56 to 0.98) | 1.00        | (0.76 to 1.32)        | 0.98        | (0.74 to 1.30)        |  |
| Q4                                              | 0.85        | (0.65 to 1.11)        | 0.85 | (0.64 to 1.11) | 0.97        | (0.74 to 1.29)        | 0.97        | (0.73 to 1.28)        |  |
| Consequence of error                            |             |                       |      |                |             |                       |             |                       |  |
| Q1                                              |             | Referent              |      | Referent       |             | Referent              |             | Referent              |  |
| Q2                                              | 0.85        | (0.65 to 1.11)        | 0.87 | (0.67 to 1.14) | 0.79        | (0.60 to 1.03)        | 0.81        | (0.62 to 1.06)        |  |
| Q3                                              | 0.84        | (0.64 to 1.10)        | 0.90 | (0.68 to 1.19) | 0.90        | (0.69 to 1.18)        | 0.98        | (0.74 to 1.29)        |  |
| Q4                                              | 1.08        | (0.84 to 1.40)        | 1.17 | (0.90 to 1.53) | 0.84        | (0.64 to 1.10)        | 0.93        | (0.71 to 1.23)        |  |
| Making decisions and solving problems           |             |                       |      |                |             |                       |             |                       |  |
| Q1                                              |             | Referent              |      | Referent       |             | Referent              |             | Referent              |  |
| Q2                                              | 0.94        | (0.73 to 1.23)        | 1.03 | (0.78 to 1.34) | 0.98        | (0.77 to 1.26)        | 1.04        | (0.80 to 1.34)        |  |

|                                       |      |                |      |                |             |                       |      |                |
|---------------------------------------|------|----------------|------|----------------|-------------|-----------------------|------|----------------|
| Q3                                    | 0.82 | (0.63 to 1.06) | 0.94 | (0.71 to 1.25) | 0.96        | (0.73 to 1.25)        | 1.06 | (0.79 to 1.41) |
| Q4                                    | 0.92 | (0.71 to 1.19) | 1.19 | (0.87 to 1.64) | <b>0.53</b> | <b>(0.39 to 0.72)</b> | 0.62 | (0.43 to 0.88) |
| Importance of being exact or accurate |      |                |      |                |             |                       |      |                |
| Q1                                    |      | Referent       |      | Referent       |             | Referent              |      | Referent       |
| Q2                                    | 1.13 | (0.87 to 1.47) | 1.21 | (0.92 to 1.58) | 0.82        | (0.63 to 1.07)        | 0.88 | (0.67 to 1.15) |
| Q3                                    | 0.96 | (0.73 to 1.27) | 1.06 | (0.80 to 1.40) | 0.84        | (0.64 to 1.10)        | 0.93 | (0.71 to 1.23) |
| Q4                                    | 1.06 | (0.81 to 1.39) | 1.20 | (0.90 to 1.59) | 0.83        | (0.64 to 1.09)        | 0.96 | (0.72 to 1.27) |

<sup>a</sup> Each Occupational Information Network (O\*NET) item ranged from 0 (lowest) to 100 (highest). O\*NET items were categorized in quartiles (Q), based on the distribution among the NBDPS control infants, for general physical activities (<23.25, 23.25-33.99, 34.00-44.85, and ≥44.86); bending or twisting the body (<15.75, 15.75-24.49, 24.50-45.99, and ≥46.00); standing (<32.75, 32.75-59.49, 59.50-79.99, and ≥80.00); handling and moving objects (<30.14, 30.14-43.28, 43.29-54.28, and ≥54.29); walking and running (<25.00, 25.00-43.37, 43.38-56.11, and ≥56.12); kneeling, crouching, or stooping (<10.00, 10.00-18.24, 18.25-27.24, and ≥27.25); keeping or regaining balance (<3.00, 3.00-7.49, 7.50-17.74, and ≥17.75); dealing with unpleasant or angry people (<42.00, 42.00-55.62, 55.63-66.62, and ≥66.63); dealing with conflict situations (<39.13, 39.13-49.74, 49.75-57.99, and ≥58.00); dealing with physically aggressive people (<5.00, 5.00-12.74, 12.75-24.74, and ≥24.75); resolving conflicts and negotiating with others (<34.14, 34.14-44.70, 44.71-58.28, and ≥58.29); making repetitive motions (<33.25, 33.25-48.24, 48.25-61.49, and ≥61.50); pace determined by speed of equipment (<5.00, 5.00-11.24, 11.25-18.24, and ≥18.25); degree of automation (<18.75, 18.75-30.99, 31.00-42.36, and ≥42.37); consequence of error (<28.50, 28.50-37.99, 38.00 to <49.99, and ≥50.00); making decisions and solving problems (<33.71, 33.71-49.56, 49.57-63.70, and ≥63.71); and importance of being exact or accurate (<63.50, 63.50-74.99, 75.00-84.74, and ≥84.75)

<sup>b</sup> Odds ratio

<sup>c</sup> 95% confidence intervals

<sup>d</sup> Adjusted for maternal age, race/ethnicity, education, and smoking
